# Supplementary material for: Co0.85Se particles encapsulated in the inner wall of nitrogen-doped carbon matrix nanotubes with rational interfacial bonds for high-performance lithium-ion batteries
Source: Royal Society of Chemistry journal article supplement (doi:10.1039/d1dt01899j), 2021-01-01
Supplement: d1dt01899j1.pdf [file d1dt01899j1.pdf]

## **Co<sub>0.85</sub>Se Particles Encapsulated in the Inner Wall of Nitrogen-Doped Carbon Matrix Nanotube with Rational Interfacial Bonds for High-Performance Lithium-Ion Batteries**

Qi Chen,<sup>a</sup> Qichen Liang,<sup>a</sup> Shu-Ang He,<sup>a</sup> Zhe Cui,<sup>a</sup> Qian Liu,<sup>\*,b</sup> Jinqi Zhu<sup>a</sup> and Rujia Zou<sup>\*,a</sup>

<sup>a</sup> State Key Laboratory for Modification of Chemical Fibers and Polymer Materials, College of Materials Science and Engineering, Donghua University, Shanghai 201620, China. E-mail: rjzou@dhu.edu.cn

<sup>b</sup> Department of Physics, College of Science, Donghua University, 201620, China. E-mail: qianliu@dhu.edu.cn

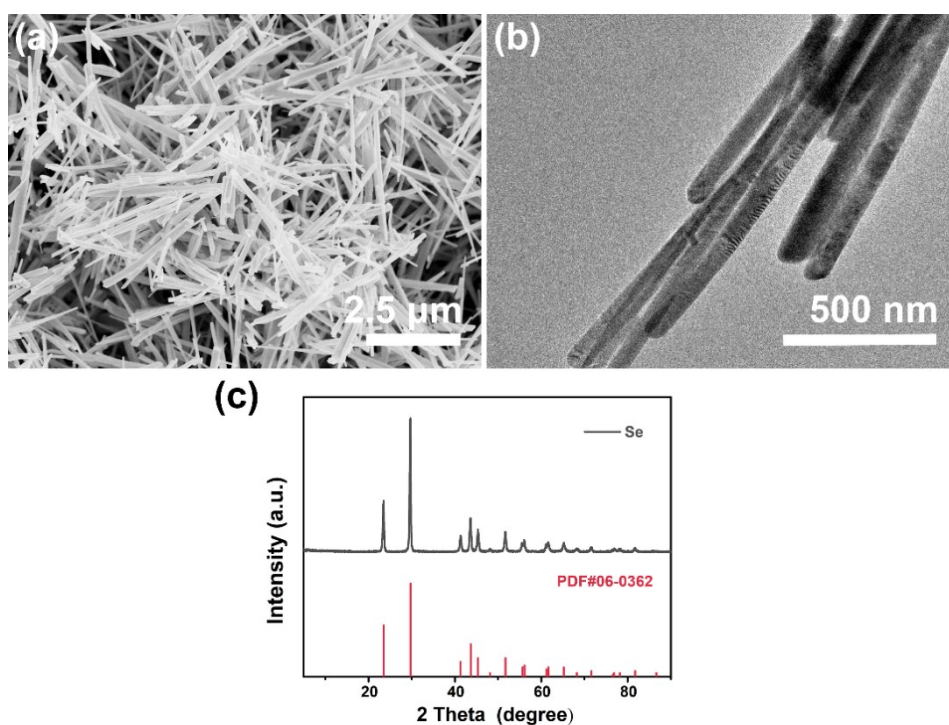

Fig. S1 (a) and (b) SEM and TEM image of Se nanowires. (c) XRD pattern of Se nanowires.

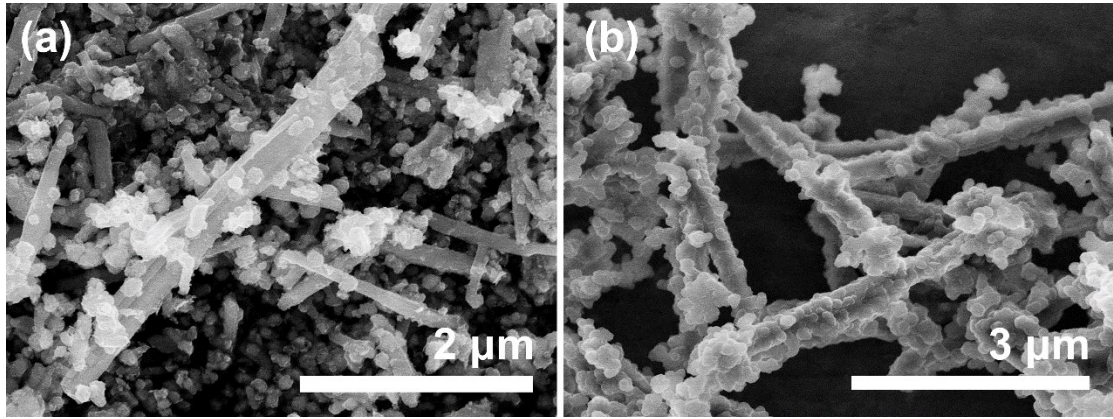

Fig. S2 (a) and (b) SEM image of Se@Co precursor and Se@Co precursor@PDA.

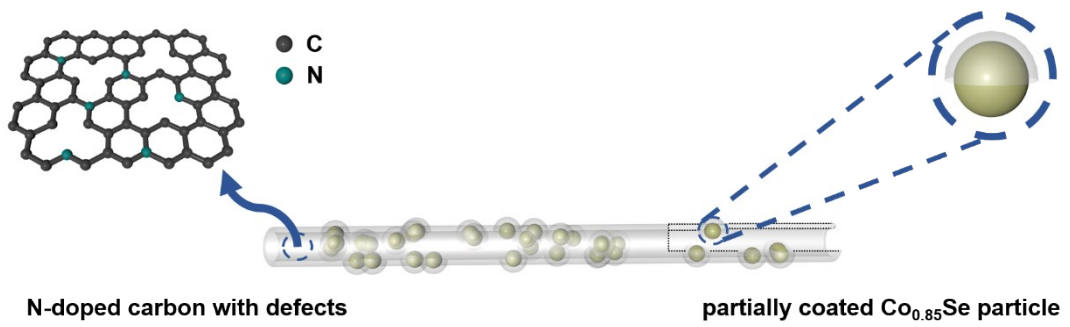

Fig. S3 The detailed composition of  $\text{Co}_{0.85}\text{Se}@NCMT$ .

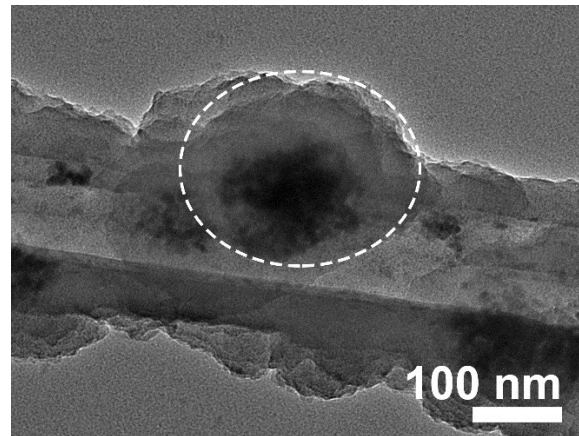

Fig. S4 TEM image of  $\text{Co}_{0.85}\text{Se}$  nanoparticle and N-doped carbon matrix.

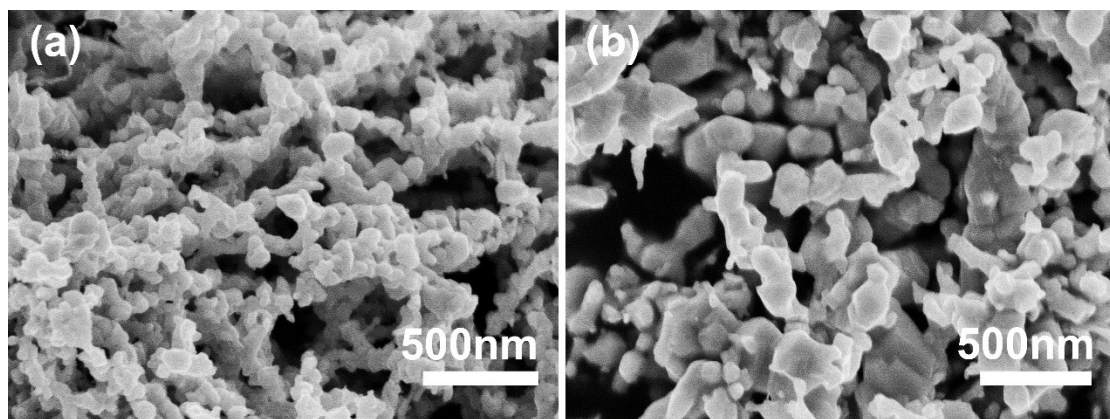

Fig. S5 (a) and (b) SEM image of NCMT@ $\text{Co}_{0.85}\text{Se}$  and  $\text{Co}_{0.85}\text{Se}$  NPs.

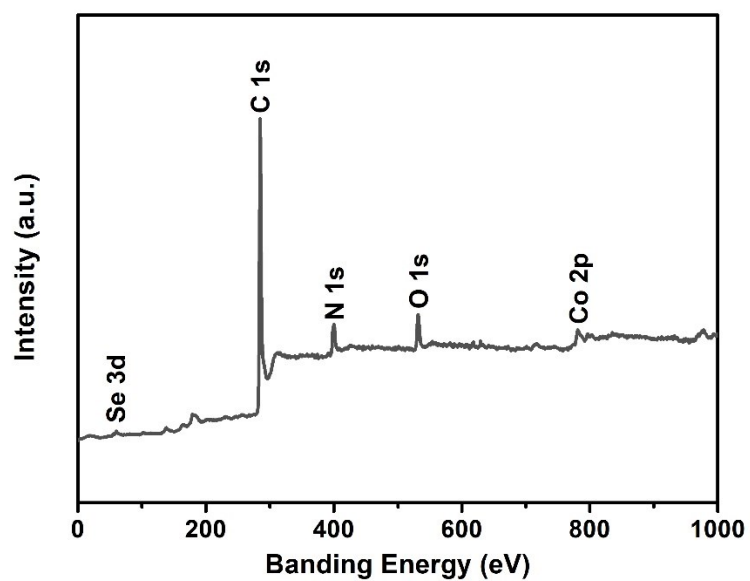

Fig. S6 The survey XPS spectrum of the  $\text{Co}_{0.85}\text{Se}@NCMT$ .

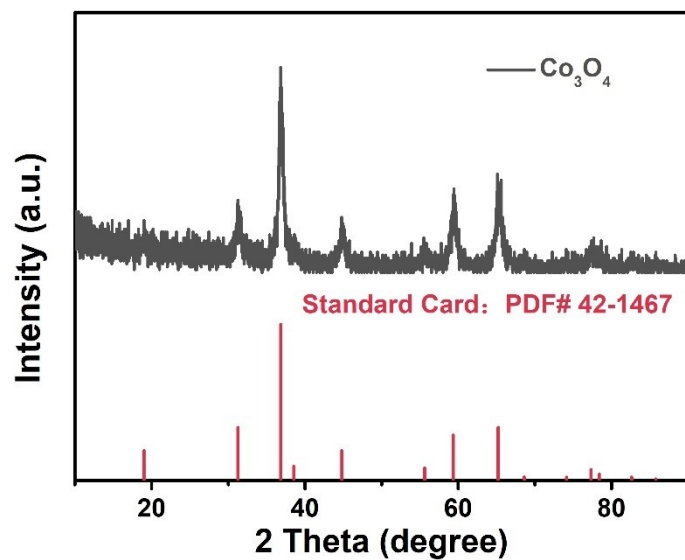

Fig. S7 The XRD pattern of  $\text{Co}_3\text{O}_4$  after TG analysis.

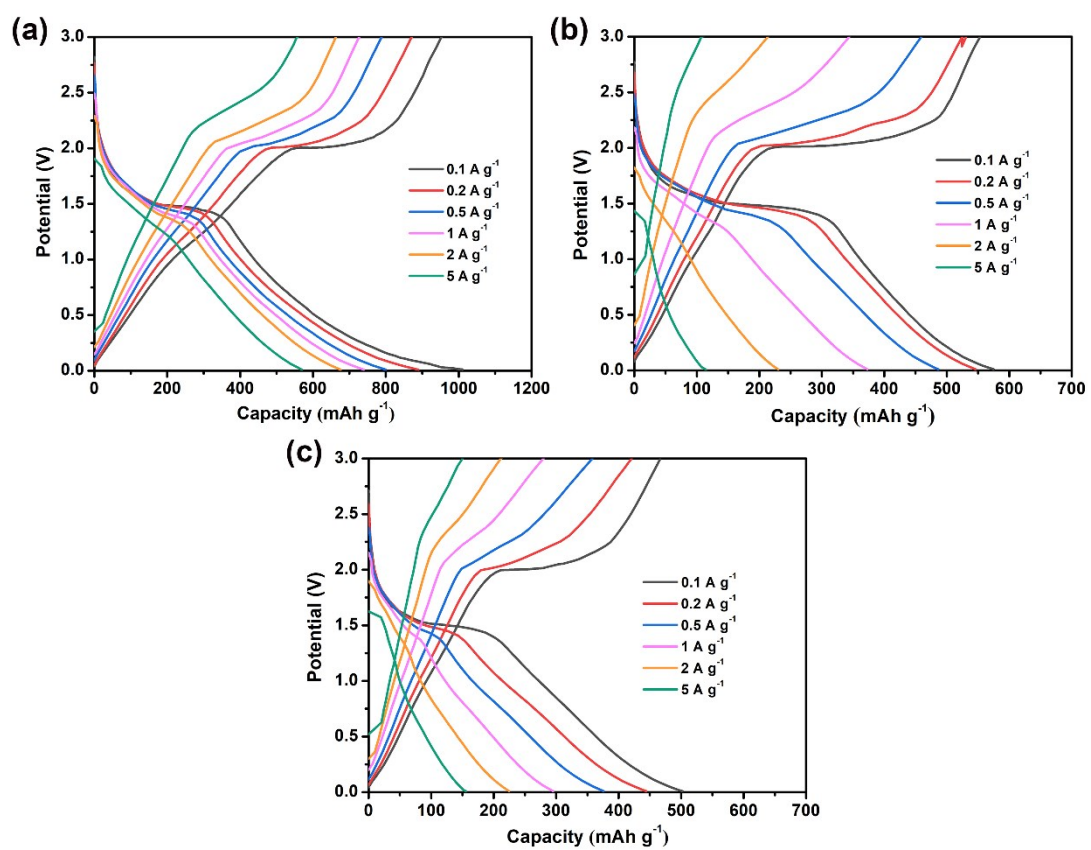

Fig. S8 Discharge-charge profiles at different current densities of Co<sub>0.85</sub>Se@NCMT (a), NCMT@Co<sub>0.85</sub>Se (b) and Co<sub>0.85</sub>Se NPs (c).

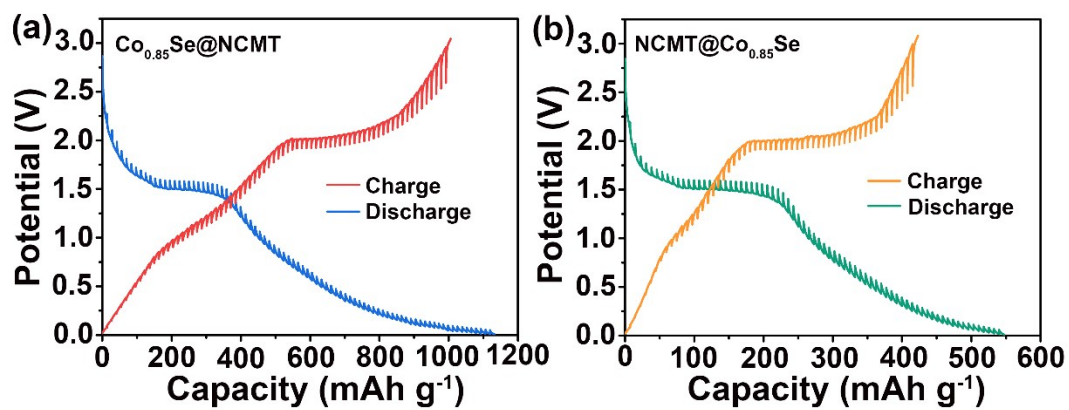

Fig. S9 GITT voltage profiles of the  $\text{Co}_{0.85}\text{Se}@NCMT$  (a) and  $NCMT@Co_{0.85}Se$  (b).

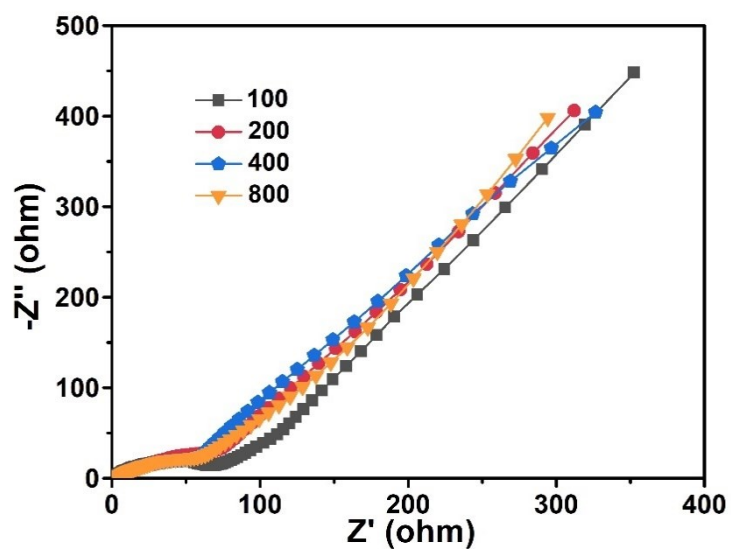

Fig. S10 Nyquist plot of the  $\text{Co}_{0.85}\text{Se}@NCMT$  electrodes after different cycles.



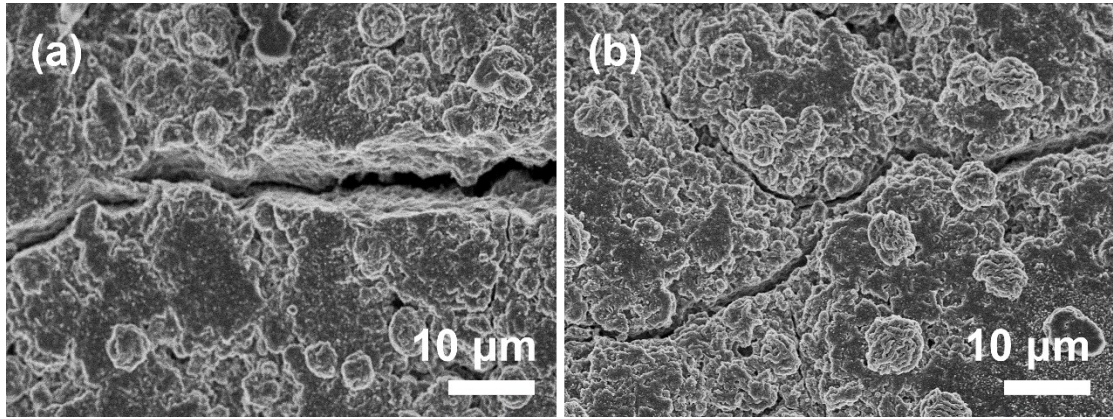

Fig. S11 (a) NCMT@Co<sub>0.85</sub>Se electrode after 100 cycles. (b) Co<sub>0.85</sub>Se NPs electrode after 100 cycles.

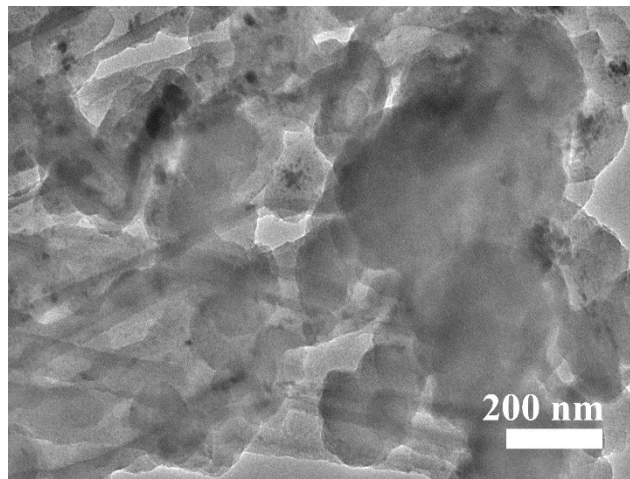

Fig. S12 The TEM image of NCMT@Co<sub>0.85</sub>Se electrode after 100 cycles.

Table S1. Comparison of the cycle performances of Co<sub>0.85</sub>Se@NCMT electrode with other CoSe<sub>x</sub>-based anode materials reported in the literature.

| Electrodes                            | Current density (A g <sup>-1</sup> ) | Cycle number | Initial capacity (mAh g <sup>-1</sup> ) | Reversible capacity (mAh g <sup>-1</sup> ) | Capacity retention (%) | Ref.             |
|---------------------------------------|--------------------------------------|--------------|-----------------------------------------|--------------------------------------------|------------------------|------------------|
| <b>Co<sub>0.85</sub>Se@NCMT</b>       | <b>0.2</b>                           | <b>100</b>   | <b>775.5</b>                            | <b>884.7</b>                               | <b>114.1</b>           | <b>This work</b> |
|                                       | <b>5</b>                             | <b>800</b>   | <b>465.1</b>                            | <b>462.9</b>                               | <b>99.5</b>            |                  |
| CoSe <sub>2</sub> /NC                 | 0.1                                  | 100          |                                         | 438                                        |                        | Ref. 41          |
|                                       | 1                                    | 500          |                                         | 282.1                                      |                        |                  |
| CoSe/NC                               | 1                                    | 100          | 808                                     | 796                                        | 98.5                   | Ref. 22          |
| CoSe/Co@NC                            | 0.2                                  | 100          |                                         | 630                                        |                        | Ref. 42          |
|                                       | 1                                    | 500          |                                         | 640                                        |                        |                  |
| ZnCoSe@NC                             | 1                                    | 1000         | 610                                     | 768                                        | 125.9                  | Ref. 43          |
| CoSe-rGO                              | 2                                    | 500          | 954.9                                   | 764.8                                      | 80.1                   | Ref. 23          |
| CoSe@PCP                              | 0.2                                  | 100          |                                         | 675                                        |                        | Ref. 35          |
| CoSe@carbon nanoboxes                 | 0.2                                  | 100          | 796                                     | 860                                        | 108.1                  | Ref. 44          |
|                                       | 0.5                                  | 100          | 752                                     | 711                                        | 94.5                   |                  |
|                                       | 1                                    | 100          | 721                                     | 660                                        | 91.6                   |                  |
| Pure Co <sub>0.85</sub> Se nanosheets | 0.2                                  | 50           | 650                                     | 516                                        | 79                     | Ref. 18          |
|                                       | 0.5                                  | 50           | 576                                     | 295                                        | 51                     |                  |
| NC@Co <sub>0.85</sub> Se              | 0.2                                  | 100          | 890                                     | 636                                        | 71.5                   | Ref. 45          |
|                                       | 5                                    | 500          | 610                                     | 399                                        | 65.4                   |                  |
| Co <sub>0.85</sub> Se-2/NPC-5         | 1                                    | 200          | 663.6                                   | 638.4                                      | 96.2                   | Ref. 21          |
| Co <sub>0.85</sub> Se/NC              | 1                                    | 300          | 890                                     | 726                                        | 81.6                   | Ref. 46          |
